# Supplementary material for: Cd and Zn interactions and toxicity in ectomycorrhizal basidiomycetes in axenic culture
Source: PeerJ. 2018 Mar 7;6:e4478. doi: 10.7717/peerj.4478 (PMC5845391; doi:10.7717/peerj.4478)
Supplement: Supplemental Information 1 — Sheet 1—Dry weight of five ectomycorrhizal species exposed to a range of Cd and Zn concentrations (Data used for Figs. 1 and 2). Sheet 2—Dry weight of four ECM species exposed to a combination of different Cd and Zn concentrations (Data used for Fig. 3). Sheet 3—Dry weight and radial growth of Hebeloma subsaponaceum and Scleroderma sp exposed to a combination of Cd and Zn concentrations (Liquid media vs Solid media) (Data used for Table 2 and Fig. 4). [file peerj-06-4478-s002.xls]

## Sheet: DRY WEIGHT (Fig 1)
Data reported in Figure 1
Species	Metal	Conc. mg/l	Conc.	I	II	III	IV	Average	Min	Max
				mg L-1
Austroboletus occidentalis (AB)	Cd	0	0	5.75	5.6	6.72	7.85	6.48	5.6	7.85
		1	1	1.16	1.01	0.95	0.74	0.965	0.74	1.16
		3	2	1.34	0.62	0.76	1.43	1.0375	0.62	1.43
		9	3	1	1.2	0.9	0.96	1.015	0.9	1.2
		27	4	0.98	0.99	1	0.96	0.9825	0.96	1
		81	5	0.72	0.93	1.5	0.85	1	0.72	1.5
		243	6	1.16	1.29	2.01	1.05	1.3775	1.05	2.01
	Zn	0	0	2.01	3.62	2.07	4.47	3.0425	2.01	4.47
		0.62	1	3.98	6.52	5.33	6.33	5.54	3.98	6.52
		30	2	1.84	1.77	1.85	1.97	1.8575	1.77	1.97
		90	3	1.8	0.04	1.68	1.89	1.3525	0.04	1.89
		270	4	0.77	0.97	1.22	1.25	1.0525	0.77	1.25
		810	5	1.07	0.88	0.88	1	0.9575	0.88	1.07
		2430	6	1.19	1.25	1.23	1.12	1.1975	1.12	1.25
Hebeloma cylindrosporum (K)	Cd	0	0	9.05	9.56	9.54	9.04	9.2975	9.04	9.56
		1	1	1.71	1.07	1.18	1.26	1.305	1.07	1.71
		3	2	1.53	1.3	1.49	1.13	1.3625	1.13	1.53
		9	3	1.03	1.1	1.17	0.97	1.0675	0.97	1.17
		27	4	0.79	0.93	0.84	0.59	0.7875	0.59	0.93
		81	5	0.74	1.04	0.68	1.05	0.8775	0.68	1.05
		243	6	2.1	1.03	1.08	0.83	1.26	0.83	2.1
	Zn	0	0	5.89	6.15	6.02	5.9	5.99	5.89	6.15
		0.62	1	8.28	8.6	8.37	8.64	8.4725	8.28	8.64
		30	2	8	8.57	8.88	9.25	8.675	8	9.25
		90	3	8.08	7.52	7.83	7.89	7.83	7.52	8.08
		270	4	1.78	1.1	1.91	3.61	2.1	1.1	3.61
		810	5	0.98	0.86	0.98	0.7	0.88	0.7	0.98
		2430	6	1.31	1.44	1.15	1.31	1.3025	1.15	1.44
H. crustuliniforme (M)	Cd	0	0	6.81	5.45	5.21	4.34	5.4525	4.34	6.81
		1	1	3.27	4.72	4.51	2.8	3.825	2.8	4.72
		3	2	3.31	2.54	3.05	4.11	3.2525	2.54	4.11
		9	3	2.2	2.64	3.65	2.78	2.8175	2.2	3.65
		27	4	1.95	2.6	1.67	1.77	1.9975	1.67	2.6
		81	5	0.96	0.87	1.05	1.22	1.025	0.87	1.22
		243	6	1.08	1.06	1.05	1.21	1.1	1.05	1.21
	Zn	0	0	4.61	3.93	3.29	2.39	3.555	2.39	4.61
		0.62	1	2.59	3.45	2.51	3.19	2.935	2.51	3.45
		30	2	2.44	2.08	1.91	2.29	2.18	1.91	2.44
		90	3	2.08	1.56	1.7	1.62	1.74	1.56	2.08
		270	4	0.97	0.71	0.98	1.26	0.98	0.71	1.26
		810	5	1.06	0.92	1.08	0.84	0.975	0.84	1.08
		2430	6	1.43	1.62	1.2	1.65	1.475	1.2	1.65
H. subsaponaceum (W)	Cd	0	0	11.35	11.9	10.87	10.88	11.25	10.87	11.9
		1	1	6.6	8.43	6.17	6.43	6.9075	6.17	8.43
		3	2	2.79	3.88	3.48	6.09	4.06	2.79	6.09
		9	3	2.18	2.19	1	1.07	1.61	1	2.19
		27	4	0.76	0.68	1.19	1.3	0.9825	0.68	1.3
		81	5	1.07	1.36	0.96	1.15	1.135	0.96	1.36
		243	6	1.06	0.84	1.06	1.04	1	0.84	1.06
	Zn	0	0	9.03	10.54	5.82	10.99	9.095	5.82	10.99
		0.62	1	12.5	12.11	12.22	11.57	12.1	11.57	12.5
		30	2	12.45	12.65	13.35	12.73	12.795	12.45	13.35
		90	3	8.14	8.1	8.78	10.87	8.9725	8.1	10.87
		270	4	2.47	2.02	2.37	2.73	2.3975	2.02	2.73
		810	5	0.76	0.86	0.89	0.91	0.855	0.76	0.91
		2430	6	1.16	0.96	1.17	1.43	1.18	0.96	1.43
Scleroderma sp. (Scl Hu)	Cd	0	0	11.47	9.86	10.94	12.65	11.23	9.86	12.65
		1	1	7.58	12.26	12.01	6.78	9.6575	6.78	12.26
		3	2	9.59	8.18	10.39	10.82	9.745	8.18	10.82
		9	3	0.89	1.5	2.28	1.77	1.61	0.89	2.28
		27	4	0.74	0.82	0.78	0.9	0.81	0.74	0.9
		81	5	1.08	1.4	1.2	1.11	1.1975	1.08	1.4
		243	6	0.95	0.95	0.91	0.8	0.9025	0.8	0.95
	Zn	0	0	5.04	4.69	6.68	7.08	5.8725	4.69	7.08
		0.62	1	11.55	11.85	11.75	11.57	11.68	11.55	11.85
		30	2	11.28	10.92	10.86	11.77	11.2075	10.86	11.77
		90	3	9.8	8.89	9.64	10.33	9.665	8.89	10.33
		270	4	1.03	1.15	1.45	1.23	1.215	1.03	1.45
		810	5	1.08	0.86	0.73	0.96	0.9075	0.73	1.08
		2430	6	0.81	1.23	1.05	1.35	1.11	0.81	1.35

## Sheet: Dry Weight Zn + Cd (Fig 3)
Data reported in Figure 3
	Austroboletus occidentalis			Hebeloma crustuliniforme			Hebeloma subsaponaceum			Scleroderma sp.
Zn (mg L-1)	Cd concentrations (mg L-1)
	0	1	9	0	1	9	0	1	9	0	1	9
0	5.91	1.09	0.95	2.98	2.84	2.98	8.23	3.48	0.86	3.96	4.65	0.82
0	5.83	1.1	0.87	3.24	3.12	3.25	11.06	2.49	0.95	3.3	2.6	0.69
0	3.47	0.92	0.83	3.53	3.52	3.08	8.27	2.1	0.79	4.9	2.67	0.81
0	6.33	1.16	0.76	4.35	3.3	2.53	10.2	1.95	0.89	3.66	3.56	0.73
1	3.64	0.21	0.74	2.96	3.77	2.65	12.01	2.09	0.99	2.9	3.07	0.85
1	2.81	0.84	0.79	3.81	2.66	2.73	11.45	4.61	0.76	2.63	3.35	0.85
1	6.28	0.95	1.03	3.63	2.8	3.11	12.39	2.37	0.89	6.52	4.37	0.77
1	6.65	0.92	0.78	4.3	2.62	3.08	12.99	1.35	0.97	2.79	3.32	0.77
9	4.52	0.83	0.53	4.84	3.86	2.76	12.36	1.79	1.14	7.84	3.59	0.91
9	3.59	1.01	0.81	3.88	2.74	2.59	12.75	2.07	0.99	4.85	3.55	0.93
9	4.74	0.97	0.87	2.37	2.97	3.2	12.44	1.57	1	7.1	2.93	0.9
9	3.07	0.73	0.87	2.25	2.6	3.23	11.78	2.16	1.07	4.77	3.95	0.82
30	6.32	0.96	0.81	2.37	2.62	2.6	12.23	3.84	1.09	5.25	3.65	0.96
30	1.99	0.93	0.97	2.1	2.55	2.18	12.64	3.87	1.45	5.31	1.93	0.85
30	1.65	0.95	0.71	1.95	2.87	2.4	13.56	2.94	1.17	5.08	5.11	0.82
30	3.45	0.94	0.89	2.44	2.85	2.61	12.85	2.91	1.07	6.42	5.01	0.88
Data for A. occidentalis and H. crustuliniforma were not reported in the manuscript .

## Sheet: Cd + Zn (Table 2, Fig 4)
	Dry weight (mg) in Liquid Medium								Hebeloma subsaponaceum			Scleroderma sp.
	Hebeloma subsaponaceum			Scleroderma sp.				sd deviation
	Cd (mg/L)								Cd (mg/L)
Zn (mg/L)	0	1	9	0	1	9		Zn (mg/L)	0	1	9	0	1	9
0	10.8	8.8	3.4	1.3	1.2	1.2		0	0.248747	2.2095	0.567891	3.16178	1.64526	0.25
0	11.1	14	2.7	4.7	2	1.6		30	7.71152	0.562917	0.415331	1.20623	0.501871	0.147902
0	10.8	10.5	1.8	9.4	2.2	1.9		60	0.326917	0.591608	0.497494	0.825757	0.649519	0.15
0	11.4	8.4	2.7	2.1	5.5	1.5		120	2.14636	2.36683	0.414578	0.291548	0.216506	0.141421
30	26.8	11.7	3.3	9.7	10.4	1.5
30	17.2	11.9	2.3	11.6	10.5	1.4		st error
30	10.4	11.4	3	9.7	11.3	1.1			Cd (mg/L)
30	29.8	12.9	2.4	8.2	9.9	1.3		Zn (mg/L)	0	1	9	0	1	9
60	11.2	12.6	3	7.3	2.9	1.3		0	0.124373	1.10475	0.283945	1.58089	0.822629	0.125
60	11.1	13.8	4.2	5	1.4	1.3		30	3.85576	0.281458	0.207666	0.603117	0.250936	0.073951
60	11.8	13	3	5.8	2.4	1		60	0.163459	0.295804	0.248747	0.412879	0.32476	0.075
60	11.8	12.2	3.2	6	1.4	1.4		120	1.07318	1.18341	0.207289	0.145774	0.108253	0.0707107
120	8.3	8.1	2.2	2.1	1.4	1.1
120	12.4	12.7	2.7	1.4	1.2	1.1
120	6.5	9.3	2.2	1.5	1.8	0.9
120	9.5	6.2	3.2	1.4	1.5	1.3
	Dry weight (mg) in Solid Medium
	Hebeloma subsaponaceum			Scleroderma sp.					Hebeloma subsaponaceum			Scleroderma sp.
	Cd (mg/L)							st deviation	Cd (mg/L)
Zn (mg/L)	0	1	9	0	1	9		Zn (mg/L)	0	1	9	0	1	9
0	9.4	11	5.2	25.8	17.8	14.8		0	1.24574	1.55624	0.714143	5.36982	2.58167	2.54018
0	12.8	8.8	5.2	11.3	16.1	10.6		30	1.27475	1.92273	0.147902	3.0749	5.77603	3.04744
0	10.3	12.4	4	16	13.3	16.5		60	0.227761	0.383243	0.147902	3.41797	0.884237	2.06216
0	10.8	8.7	3.6	14.9	20.4	17.1		120	0.895475	0.983616	0.60156	1.94984	1.53867	4.92392
30	9.8	10	5.5	14.1	17.4	16.7
30	9.9	8.4	5.8	17.5	29.7	11.3		st error
30	7	10.8	5.4	20	16.1	12.5			Cd (mg/L)
30	10.1	13.7	5.6	22.4	15.8	8.2		Zn (mg/L)	0	1	9	0	1	9
60	8.8	8.6	5.3	23.1	14.4	16.3		0	0.622871	0.778119	0.357071	2.68491	1.29083	1.27009
60	8.9	8.5	5.4	15.6	13.2	11.8		30	0.637377	0.961363	0.073951	1.53745	2.88801	1.52372
60	9.3	7.7	5.7	22.4	14.4	11.2		60	0.11388	0.191621	0.073951	1.70898	0.442118	1.03108
60	9.3	7.9	5.5	16.3	15.7	11.7		120	0.447737	0.491808	0.30078	0.97492	0.769334	2.46196
120	9.3	6.2	4.5	15.1	14	7.2
120	8.2	8.6	4.6	17.7	12	3.4
120	8.4	8.6	4.3	20.3	10	4.9
120	6.8	8	3.1	16.2	10.6	16.1
	Radial Growth (cm) in Solid Medium
	Hebeloma subsaponaceum			Scleroderma sp.					Hebeloma subsaponaceum			Scleroderma sp.
	Cd (mg/L)							st deviation	Cd (mg/L)
Zn (mg/L)	0	1	9	0	1	9		Zn (mg/L)	0	1	9	0	1	9
0	2.9	2.55	1.1	6.45	6.05	4.6		0	0.176777	0.0544862	0.11388	0.288043	0.34187	0.163459
0	2.95	2.65	1.3	5.7	6.35	4.35		30	0.30104	0.0559017	0.0353553	0.427748	0.316968	0.340037
0	3.35	2.7	1.4	6	5.55	4.2		60	0.108972	0.136931	0.0544862	0.223607	0.420379	0.38487
0	3	2.65	1.35	5.8	5.55	4.2		120	0.195256	0.05	0.0649519	0.330483	0.266927	0.734847
30	2.75	2.5	1.15	6.7	6.25	5.35
30	3.2	2.55	1.2	5.5	6.3	5.3		st error
30	2.35	2.4	1.2	6	6.55	4.95			Cd (mg/L)
30	2.8	2.45	1.25	6.15	7.05	4.5		Zn (mg/L)	0	1	9	0	1	9
60	2.7	2.25	1.1	6.4	6.6	6.3		0	0.0883883	0.0272431	0.0569402	0.144021	0.170935	0.0817294
60	2.8	2.55	1.15	6.6	7.05	6		30	0.15052	0.0279508	0.0176777	0.213874	0.158484	0.170018
60	2.7	2.2	1.15	6.2	6	5.95		60	0.0544862	0.0684653	0.0272431	0.111803	0.21019	0.192435
60	2.5	2.4	1.25	6.8	6.1	5.25		120	0.0976281	0.025	0.032476	0.165241	0.133463	0.367423
120	2.4	2.35	0.95	6.3	6.75	5.1
120	2.05	2.25	1.05	7.1	6.2	3.3
120	2.5	2.35	1.1	7.05	6.05	3.9
120	2.55	2.25	0.95	6.6	6.2	4.9

## Sheet: Figure 4 TI% calc.
LIQUID	Hebeloma			Scleroderma				SOLID	Hebeloma			Scleroderma			SOLID
	Cd	Biomass (mg)	Zn	Cd	Biomass (mg)	Zn			Cd	Biomass (mg)	Zn	Cd	Biomass (mg)	Zn
	0	10.8	0	0	1.3	0			0	9.4	0	0	25.8	0
	0	11.1	0	0	4.7	0			0	12.8	0	0	11.3	0
	0	10.8	0	0	9.4	0			0	10.3	0	0	16	0
	0	11.4	0	0	2.1	0			0	10.8	0	0	14.9	0
	0	26.8	30	0	9.7	30			0	9.8	30	0	14.1	30
	0	17.2	30	0	11.6	30			0	9.9	30	0	17.5	30
	0	10.4	30	0	9.7	30			0	7	30	0	20	30
	0	29.8	30	0	8.2	30			0	10.1	30	0	22.4	30
	0	11.2	60	0	7.3	60			0	8.8	60	0	23.1	60
	0	11.1	60	0	5	60			0	8.9	60	0	15.6	60
	0	11.8	60	0	5.8	60			0	9.3	60	0	22.4	60
	0	11.8	60	0	6	60			0	9.3	60	0	16.3	60
	0	8.3	120	0	2.1	120			0	9.3	120	0	15.1	120
	0	12.4	120	0	1.4	120			0	8.2	120	0	17.7	120
	0	6.5	120	0	1.5	120			0	8.4	120	0	20.3	120
	0	9.5	120	0	1.4	120			0	6.8	120	0	16.2	120
	1	8.8	0	1	1.2	0			1	11	0	1	17.8	0
	1	14	0	1	2	0			1	8.8	0	1	16.1	0
	1	10.5	0	1	2.2	0			1	12.4	0	1	13.3	0
	1	8.4	0	1	5.5	0			1	8.7	0	1	20.4	0
	1	11.7	30	1	10.4	30			1	10	30	1	17.4	30
	1	11.9	30	1	10.5	30			1	8.4	30	1	29.7	30
	1	11.4	30	1	11.3	30			1	10.8	30	1	16.1	30
	1	12.9	30	1	9.9	30			1	13.7	30	1	15.8	30
	1	12.6	60	1	2.9	60			1	8.6	60	1	14.4	60
	1	13.8	60	1	1.4	60			1	8.5	60	1	13.2	60
	1	13	60	1	2.4	60			1	7.7	60	1	14.4	60
	1	12.2	60	1	1.4	60			1	7.9	60	1	15.7	60
	1	8.1	120	1	1.4	120			1	6.2	120	1	14	120
	1	12.7	120	1	1.2	120			1	8.6	120	1	12	120
	1	9.3	120	1	1.8	120			1	8.6	120	1	10	120
	1	6.2	120	1	1.5	120			1	8	120	1	10.6	120
	9	3.4	0	9	1.2	0			9	5.2	0	9	14.8	0
	9	2.7	0	9	1.6	0			9	5.2	0	9	10.6	0
	9	1.8	0	9	1.9	0			9	4	0	9	16.5	0
	9	2.7	0	9	1.5	0			9	3.6	0	9	17.1	0
	9	3.3	30	9	1.5	30			9	5.5	30	9	16.7	30
	9	2.3	30	9	1.4	30			9	5.8	30	9	11.3	30
	9	3	30	9	1.1	30			9	5.4	30	9	12.5	30
	9	2.4	30	9	1.3	30			9	5.6	30	9	8.2	30
	9	3	60	9	1.3	60			9	5.3	60	9	16.3	60
	9	4.2	60	9	1.3	60			9	5.4	60	9	11.8	60
	9	3	60	9	1	60			9	5.7	60	9	11.2	60
	9	3.2	60	9	1.4	60			9	5.5	60	9	11.7	60
	9	2.2	120	9	1.1	120			9	4.5	120	9	7.2	120
	9	2.7	120	9	1.1	120			9	4.6	120	9	3.4	120
	9	2.2	120	9	0.9	120			9	4.3	120	9	4.9	120
	9	3.2	120	9	1.3	120			9	3.1	120	9	16.1	120
LIQUID	Highest biomass	29.8	0 x 30 (Cd x Zn)		11.6	0 x 30 (Cd x Zn)		SOLID	Highest biomass	13.7	1 x 30 (Cd x Zn)		29.7	1 x 30 (Cd x Zn)
	Hebeloma			Scleroderma					Hebeloma			Scleroderma
	Cd	TI%	Zn	Cd	TI%	Zn			Cd	TI%	Zn	Cd	TI%	Zn
	0	36.2416	0	0	11.2069	0			0	68.6131	0	0	86.8687	0
	0	37.2483	0	0	40.5172	0			0	93.4307	0	0	38.0471	0
	0	36.2416	0	0	81.0345	0			0	75.1825	0	0	53.8721	0
	0	38.255	0	0	18.1034	0			0	78.8321	0	0	50.1684	0
	0	89.9329	30	0	83.6207	30			0	71.5328	30	0	47.4747	30
	0	57.7181	30	0	100	30			0	72.2628	30	0	58.9226	30
	0	34.8993	30	0	83.6207	30			0	51.0949	30	0	67.3401	30
	0	100	30	0	70.6897	30			0	73.7226	30	0	75.4209	30
	0	37.5839	60	0	62.931	60			0	64.2336	60	0	77.7778	60
	0	37.2483	60	0	43.1034	60			0	64.9635	60	0	52.5253	60
	0	39.5973	60	0	50	60			0	67.8832	60	0	75.4209	60
	0	39.5973	60	0	51.7241	60			0	67.8832	60	0	54.8822	60
	0	27.8523	120	0	18.1034	120			0	67.8832	120	0	50.8418	120
	0	41.6107	120	0	12.069	120			0	59.854	120	0	59.596	120
	0	21.8121	120	0	12.931	120			0	61.3139	120	0	68.3502	120
	0	31.8792	120	0	12.069	120			0	49.635	120	0	54.5455	120
	1	29.5302	0	1	10.3448	0			1	80.292	0	1	59.9327	0
	1	46.9799	0	1	17.2414	0			1	64.2336	0	1	54.2088	0
	1	35.2349	0	1	18.9655	0			1	90.5109	0	1	44.7811	0
	1	28.1879	0	1	47.4138	0			1	63.5036	0	1	68.6869	0
	1	39.2617	30	1	89.6552	30			1	72.9927	30	1	58.5859	30
	1	39.9329	30	1	90.5172	30			1	61.3139	30	1	100	30
	1	38.255	30	1	97.4138	30			1	78.8321	30	1	54.2088	30
	1	43.2886	30	1	85.3448	30			1	100	30	1	53.1987	30
	1	42.2819	60	1	25	60			1	62.7737	60	1	48.4848	60
	1	46.3087	60	1	12.069	60			1	62.0438	60	1	44.4444	60
	1	43.6242	60	1	20.6897	60			1	56.2044	60	1	48.4848	60
	1	40.9396	60	1	12.069	60			1	57.6642	60	1	52.862	60
	1	27.1812	120	1	12.069	120			1	45.2555	120	1	47.138	120
	1	42.6174	120	1	10.3448	120			1	62.7737	120	1	40.404	120
	1	31.2081	120	1	15.5172	120			1	62.7737	120	1	33.67	120
	1	20.8054	120	1	12.931	120			1	58.3942	120	1	35.6902	120
	9	11.4094	0	9	10.3448	0			9	37.9562	0	9	49.8316	0
	9	9.0604	0	9	13.7931	0			9	37.9562	0	9	35.6902	0
	9	6.04027	0	9	16.3793	0			9	29.1971	0	9	55.5556	0
	9	9.0604	0	9	12.931	0			9	26.2774	0	9	57.5758	0
	9	11.0738	30	9	12.931	30			9	40.146	30	9	56.229	30
	9	7.71812	30	9	12.069	30			9	42.3358	30	9	38.0471	30
	9	10.0671	30	9	9.48276	30			9	39.4161	30	9	42.0875	30
	9	8.05369	30	9	11.2069	30			9	40.8759	30	9	27.6094	30
	9	10.0671	60	9	11.2069	60			9	38.6861	60	9	54.8822	60
	9	14.094	60	9	11.2069	60			9	39.4161	60	9	39.7306	60
	9	10.0671	60	9	8.62069	60			9	41.6058	60	9	37.7104	60
	9	10.7383	60	9	12.069	60			9	40.146	60	9	39.3939	60
	9	7.38255	120	9	9.48276	120			9	32.8467	120	9	24.2424	120
	9	9.0604	120	9	9.48276	120			9	33.5766	120	9	11.4478	120
	9	7.38255	120	9	7.75862	120			9	31.3869	120	9	16.4983	120
	9	10.7383	120	9	11.2069	120			9	22.6277	120	9	54.2088	120
